# Supplementary material for: Azithromycin suppresses CD4+ T-cell activation by direct modulation of mTOR activity
Source: PubMed Central journal article supplement — Sci Rep. 2014 Dec 11;4:7438. doi: 10.1038/srep07438 (PMC4262884; doi:10.1038/srep07438), 2014-12-11
Supplement: srep07438-s1.pdf [file srep07438-s1.pdf]

**Supplementary Information**

**Azithromycin suppresses CD4<sup>+</sup> T-cell activation by direct modulation of mTOR activity**

F Ratzinger<sup>1</sup>, H Haslacher<sup>1</sup>, W Poepl<sup>2</sup>, G Hoermann<sup>1</sup>, J J Kovarik<sup>3</sup>, S Jutz<sup>4</sup>, P Steinberger<sup>4</sup>, H Burgmann<sup>2</sup>, W F Pickl<sup>4</sup> and K G Schmetterer<sup>1\*</sup>

<sup>1</sup> Department of Laboratory Medicine, Medical University of Vienna, Austria

<sup>2</sup> Division of Infectious Diseases and Tropical Medicine, Department of Medicine I, Medical University of Vienna, Austria

<sup>3</sup> Clinical Division of Nephrology and Dialysis, Department of Internal Medicine III, Medical University of Vienna, Austria

<sup>4</sup> Institute of Immunology, Medical University of Vienna, Austria

\*Corresponding author: Klaus G Schmetterer, Department of Laboratory Medicine, Medical University of Vienna, Vienna, Austria. Tel.: +43-1-40400-6753; Fax.: +43-1-40400-5389; email address: [klaus.schmetterer@meduniwien.ac.at](mailto:klaus.schmetterer@meduniwien.ac.at)

Supplement

Supplementary Figure S1

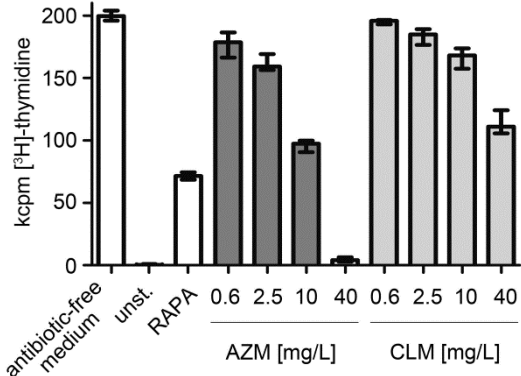

Supplement

Supplementary Figure S2

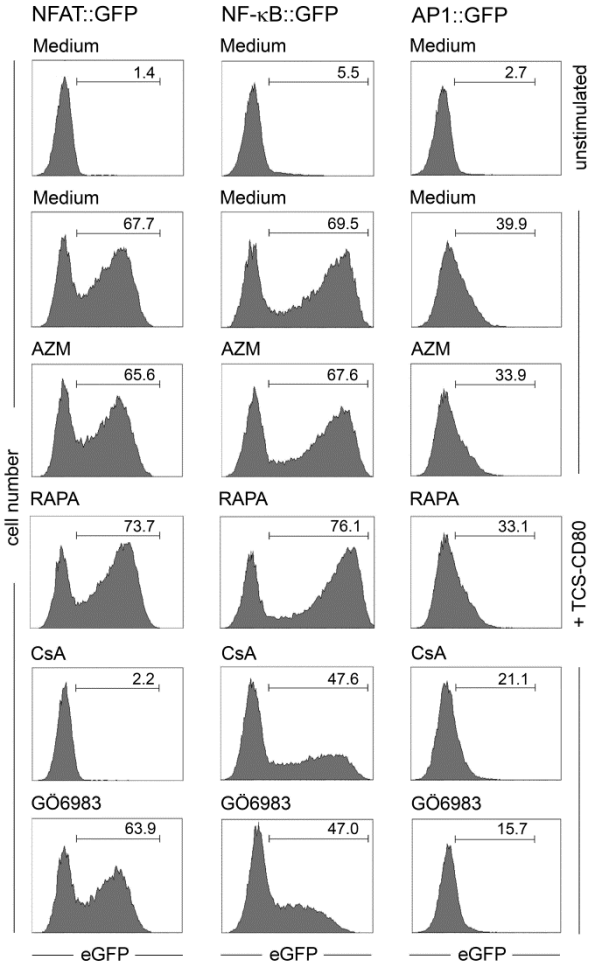

**Supplementary Table S1: Secretion of assessed effector cytokines**

| Cytokine         |                | Control               | 2.5 mg/L               |                       | 10 mg/L               |                       | 40 mg/L               |                       |
|------------------|----------------|-----------------------|------------------------|-----------------------|-----------------------|-----------------------|-----------------------|-----------------------|
|                  | p <sup>1</sup> | RAPA                  | AZM <sup>2</sup>       | CLM <sup>2</sup>      | AZM <sup>2</sup>      | CLM <sup>2</sup>      | AZM <sup>2</sup>      | CLM <sup>2</sup>      |
| <b>IL-2</b>      | <0.001         | 0.59±0.46,<br>p=0.001 | 0.73±0.13,<br>p=0.003  | 1.01±0.19,<br>p=0.879 | 0.40±0.11,<br>p<0.001 | 0.78±0.10,<br>p=0.006 | 0.27±0.14,<br>p<0.001 | 0.46±0.15,<br>p<0.001 |
| <b>IL-10</b>     | <0.001         | 0.05±0.01,<br>p<0.001 | 0.71±0.14,<br>p=0.002  | 1.05±0.10,<br>p>0.945 | 0.34±0.23,<br>p<0.001 | 0.86±0.13,<br>p=0.158 | 0.03±0.03,<br>p<0.001 | 0.59±0.27,<br>p<0.001 |
| <b>IL-13</b>     | <0.001         | 0.22±0.02,<br>p<0.001 | 0.83±0.22,<br>p=0.0403 | 0.85±0.08,<br>p=0.090 | 0.67±0.20,<br>p<0.001 | 0.86±0.06,<br>p=0.090 | 0.34±0.11,<br>p<0.001 | 0.79±0.18,<br>p=0.001 |
| <b>IL-17</b>     | <0.001         | 0.22±0.02,<br>p=0.003 | 0.69±0.19,<br>p=0.073  | 0.92±0.12,<br>p>0.999 | 0.53±0.21,<br>p=0.001 | 0.80±0.11,<br>p=0.644 | 0.28±0.11,<br>p<0.001 | 0.60±0.23,<br>p=0.041 |
| <b>IFN-gamma</b> | <0.001         | 0.09±0.03,<br>p<0.001 | 0.77±0.14,<br>p<0.001  | 0.97±0.15,<br>p=0.317 | 0.50±0.09,<br>p<0.001 | 0.90±0.19,<br>p=0.31  | 0.24±0.12,<br>p<0.001 | 0.67±0.31,<br>p<0.001 |

Numbers represent mean values (± SD) normalized to controls at the indicated AZM and CLM concentrations (mg/L), <sup>1</sup>analysis of variance (ANOVA), <sup>2</sup>Holm-Sidak's test
